# Supplementary material for: Synergistic Effect of Simultaneous Doping of Ceria Nanorods with Cu and Cr on CO Oxidation and NO Reduction
Source: PubMed Central journal article supplement (PMC7898804; doi:10.1002/chem.202004623), 2020-12-27
Supplement: CHEM-27-2165-s001.pdf [file CHEM-27-2165-s001.pdf]

# Chemistry–A European Journal

Supporting Information

## **Synergistic Effect of Simultaneous Doping of Ceria Nanorods with Cu and Cr on CO Oxidation and NO Reduction**

Shawn C. Rood,<sup>[a]</sup> Oriol Pastor-Algaba,<sup>[b]</sup> Albert Tosca-Princep,<sup>[b]</sup> Bruno Pinho,<sup>[c]</sup> Mark Isaacs,<sup>[d]</sup> Laura Torrente-Murciano,<sup>\*[c]</sup> and Salvador Eslava<sup>\*[a, e]</sup>

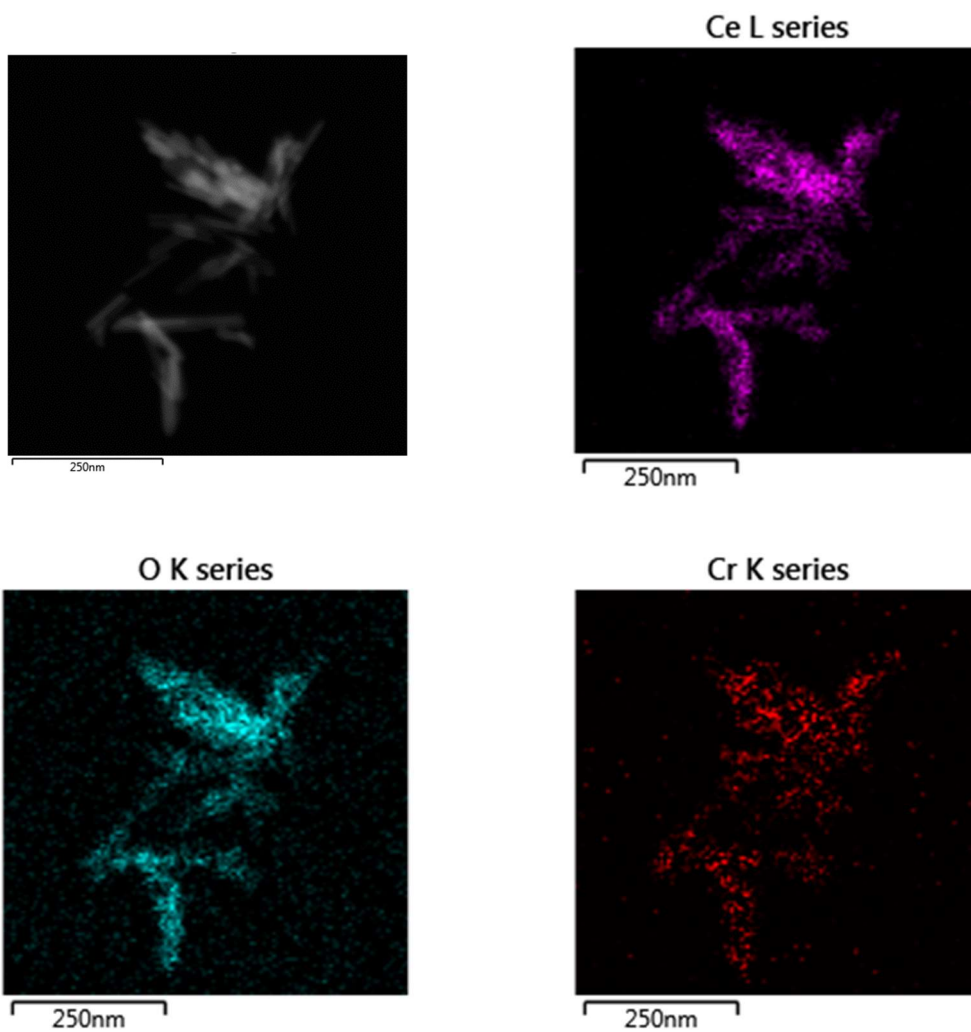

**Figure S1.** TEM-EDS analysis of 1%Cu-ceria nanorods.

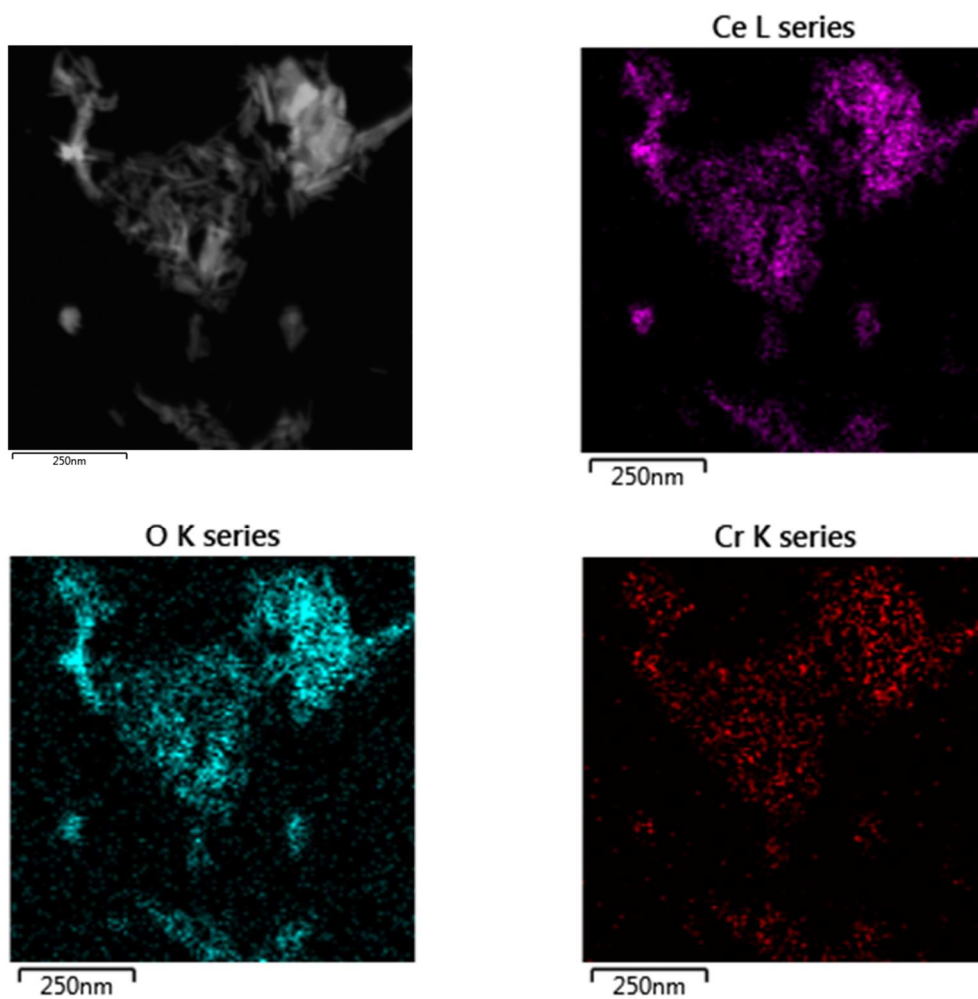

**Figure S2.** TEM-EDS analysis of 3%Cu-ceria nanorods.

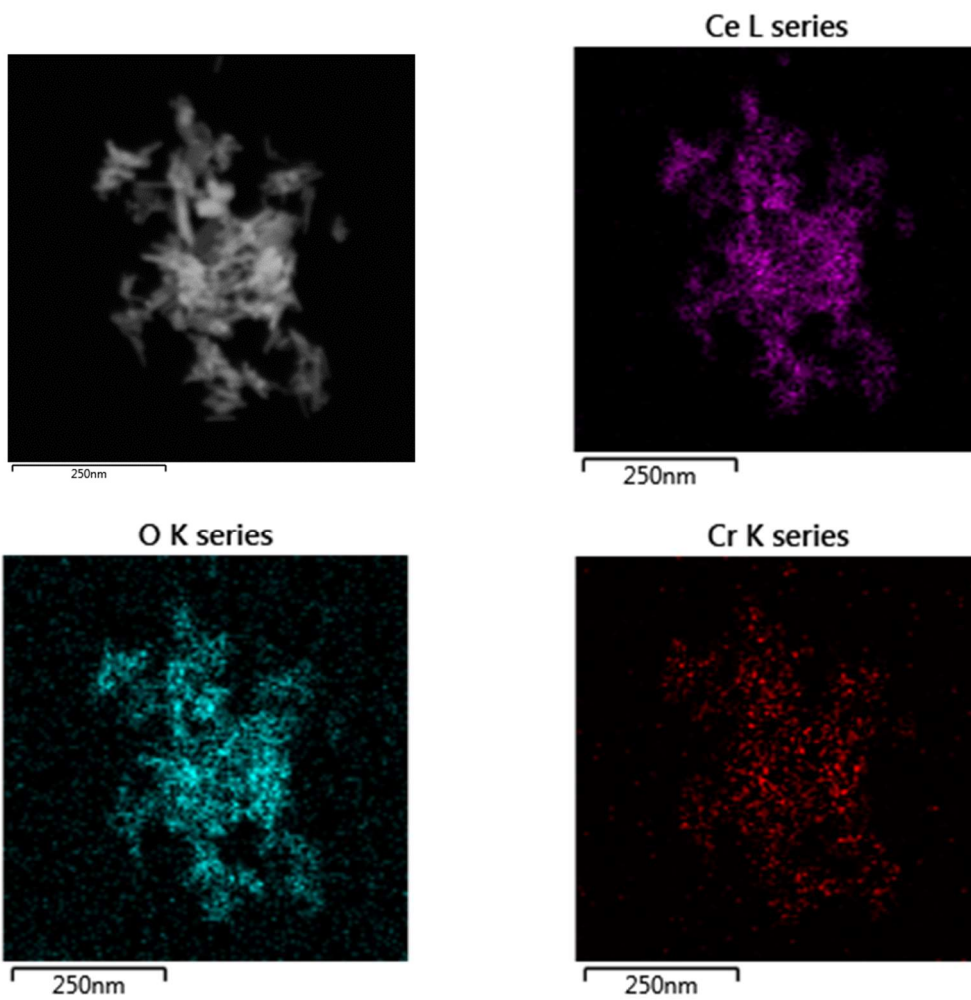

**Figure S3.** TEM-EDS analysis of 5%Cu-ceria nanorods.

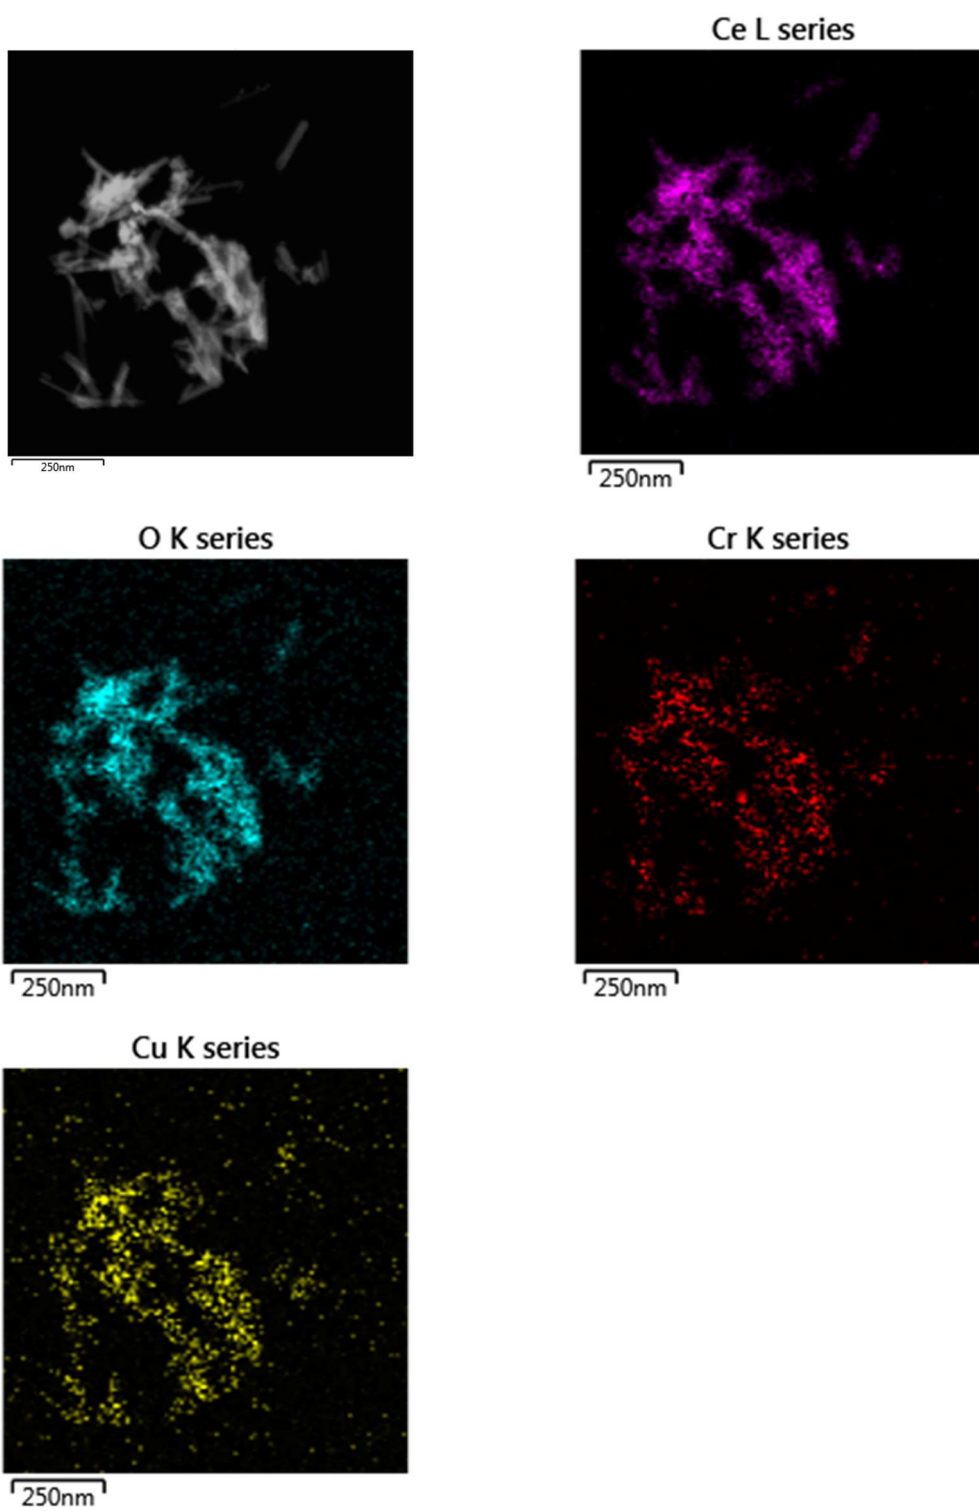

**Figure S4.** TEM-EDS analysis of 1%Cu/1%Cr-ceria nanorods.

**Table S1.** TPR peak locations and areas for undoped and doped ceria nanorods, using full Gaussian distributions as shown in Figure S1 for an example.

| Peak                          | Centre (°C) | H <sub>2</sub> consumption<br>[cm <sup>3</sup> (STP) H <sub>2</sub> g <sub>cat</sub> <sup>-1</sup> ] |
|-------------------------------|-------------|------------------------------------------------------------------------------------------------------|
| <b>Undoped ceria nanorods</b> |             |                                                                                                      |
| Low temperature 1             | 359         | 7.6                                                                                                  |
| Low temperature 2             | 467         | 1.9                                                                                                  |
| High temperature 1            | 833         | 20.2                                                                                                 |
| <b>1 wt. % Cu</b>             |             |                                                                                                      |
| Low temperature 1             | 333         | 1.7                                                                                                  |
| Low temperature 2             | 421         | 5.0                                                                                                  |
| High temperature 1            | 844         | 28.1                                                                                                 |
| <b>3 wt. % Cu</b>             |             |                                                                                                      |
| Low temperature 1             | 297         | 0.9                                                                                                  |
| Low temperature 2             | 367         | 5.6                                                                                                  |
| High temperature 1            | 831         | 24.9                                                                                                 |
| <b>5 wt. % Cu</b>             |             |                                                                                                      |
| Low temperature 1             | 275         | 1.1                                                                                                  |
| Low temperature 2             | 338         | 7.4                                                                                                  |
| High temperature 1            | 863         | 26.8                                                                                                 |
| <b>7 wt. % Cu</b>             |             |                                                                                                      |
| Low temperature 1             | 197         | 2.5                                                                                                  |
| Low temperature 2             | 222         | 5.0                                                                                                  |
| Low temperature 3             | 272         | 7.9                                                                                                  |
| High temperature 1            | 852         | 23.6                                                                                                 |
| <b>1 wt. % Cr</b>             |             |                                                                                                      |
| Low temperature 1             | 303         | 3.2                                                                                                  |
| Low temperature 2             | 418         | 6.5                                                                                                  |
| High temperature 1            | 822         | 13.9                                                                                                 |
| <b>3 wt. % Cr</b>             |             |                                                                                                      |
| Low temperature 1             | 295         | 3.9                                                                                                  |
| Low temperature 2             | 435         | 10.4                                                                                                 |
| High temperature 1            | 826         | 16.8                                                                                                 |
| <b>5 wt. % Cr</b>             |             |                                                                                                      |
| Low temperature 1             | 304         | 2.4                                                                                                  |
| Low temperature 2             | 414         | 8.7                                                                                                  |
| High temperature 1            | 822         | 14.6                                                                                                 |
| <b>1 wt. % each Cu and Cr</b> |             |                                                                                                      |
| Low temperature 1             | 192         | 3.5                                                                                                  |
| Low temperature 2             | 313         | 1.3                                                                                                  |
| Low temperature 3             | 404         | 7.1                                                                                                  |
| High temperature 1            | 798         | 11.3                                                                                                 |

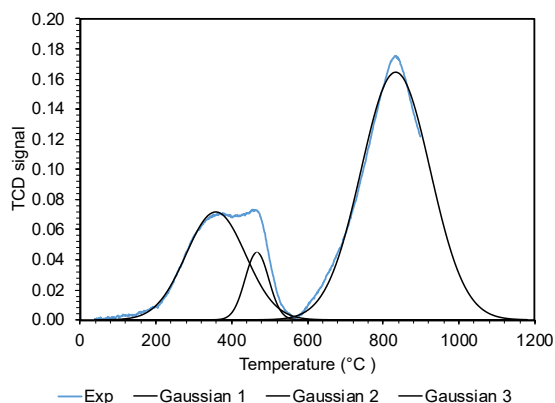

**Figure S5.** Deconvolution of the TPR experimental data with multiple Gaussian distributions (here for undoped CeO<sub>2</sub>). The full area of each gaussian peak was accounted for the calculation of the hydrogen consumption in cm<sup>3</sup> (STP) H<sub>2</sub> g<sub>cat</sub><sup>-1</sup>.

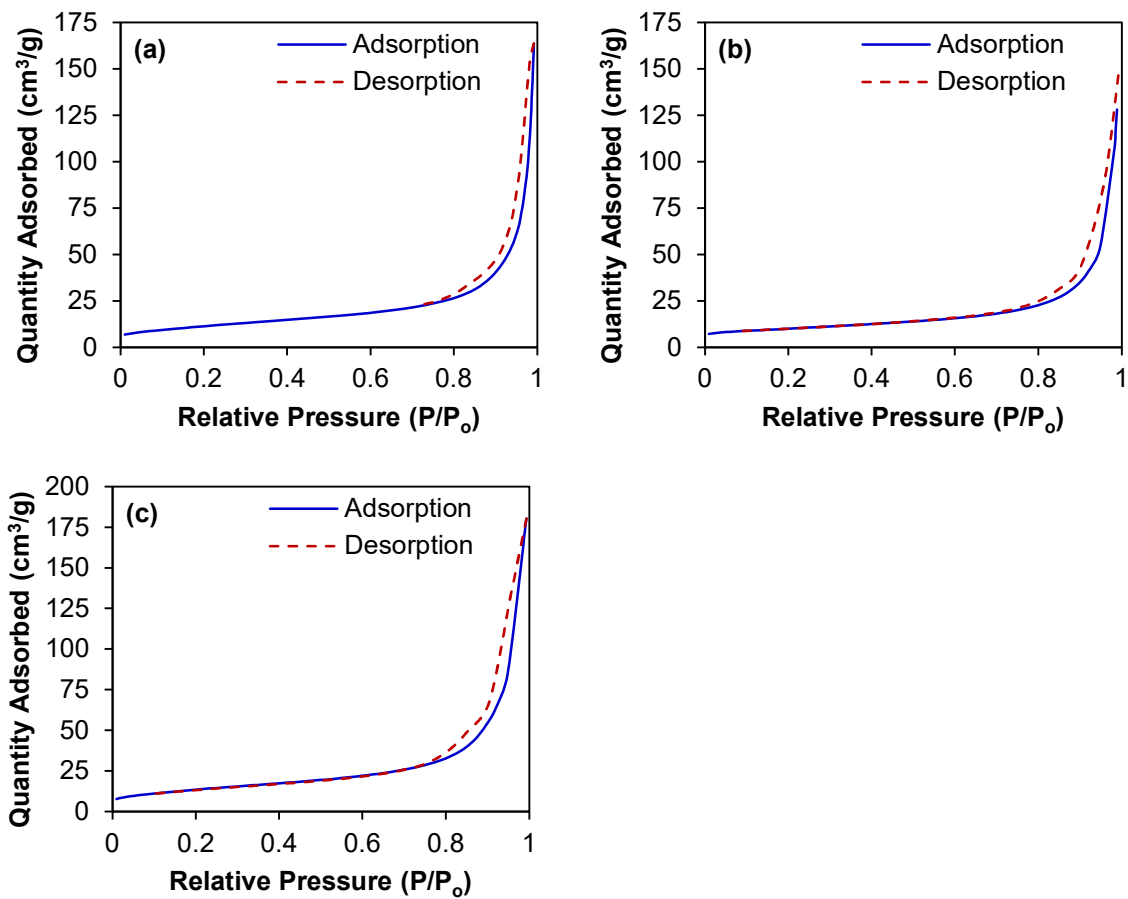

**Figure S6.** Nitrogen isotherms for (a) undoped ceria nanorods, (b) 1 wt. % Cu-doped ceria nanorods, and (c) 1 wt. % Cr-doped ceria nanorods.

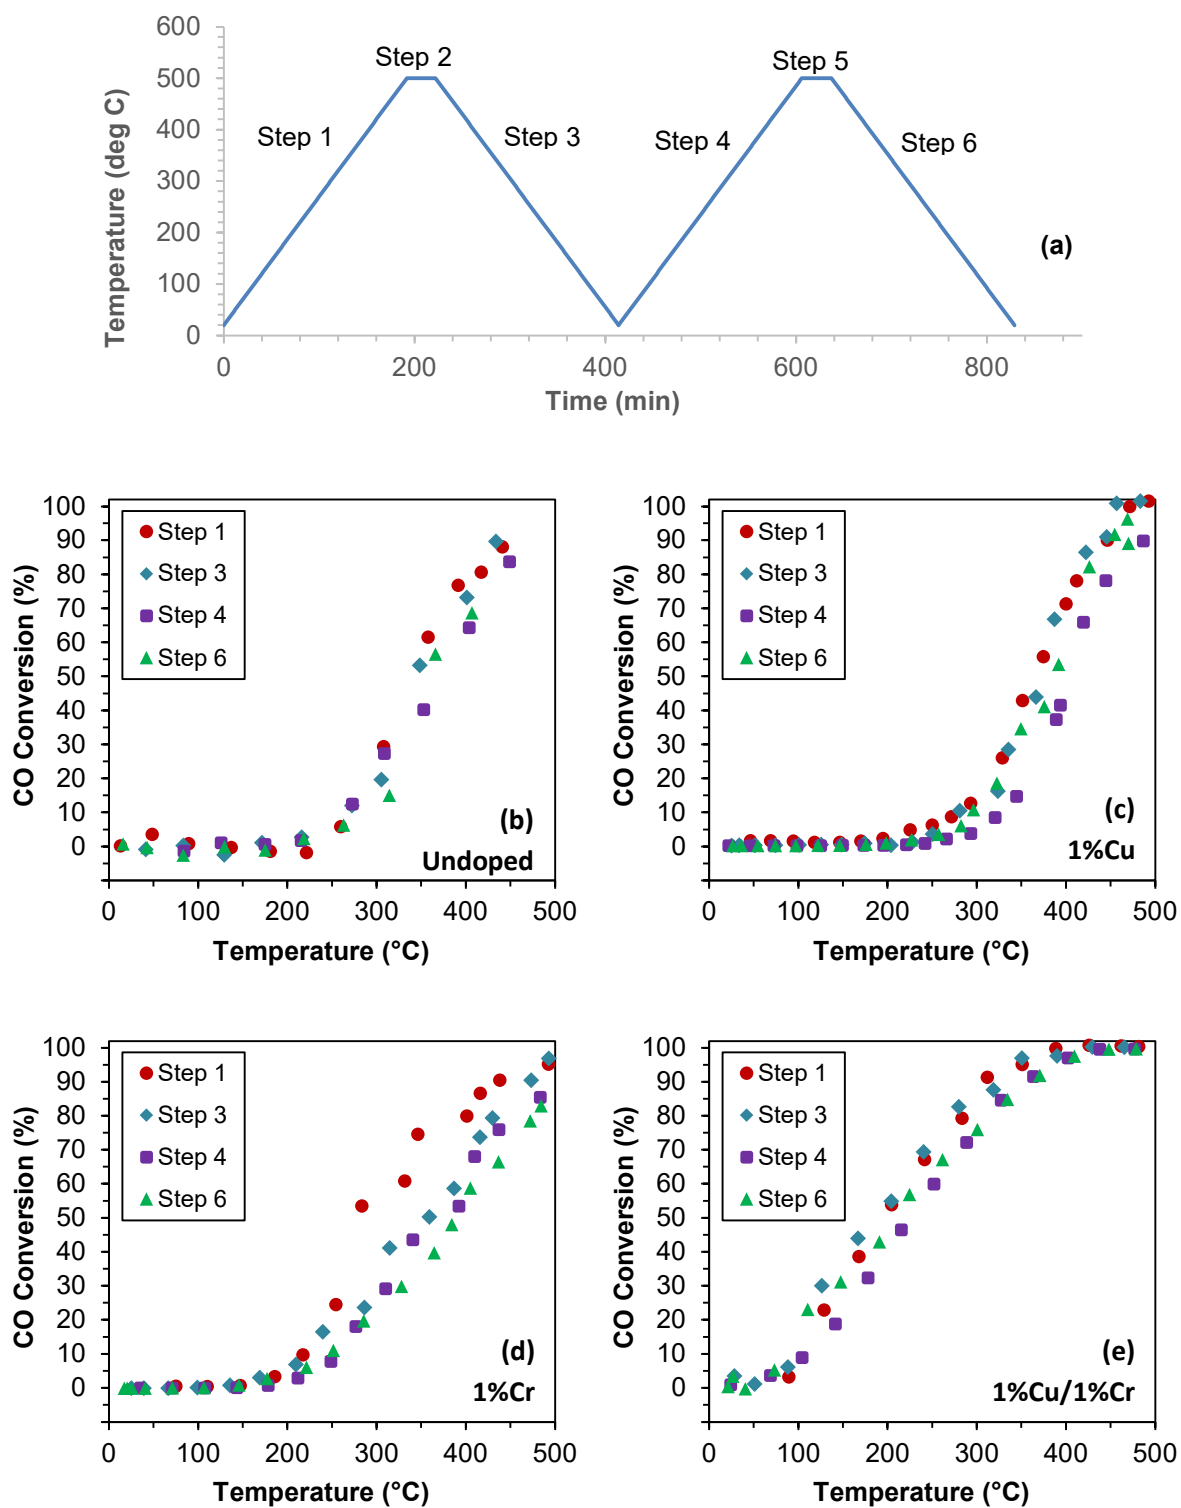

**Figure S7.** Repeated CO oxidation steps (a) at different temperatures for (b) undoped ceria nanorods, (c) 1 wt. % Cu-doped ceria nanorods, (d) 1 wt. % Cr-doped ceria nanorods, and (e) 1%Cu/1%Cr-ceria.



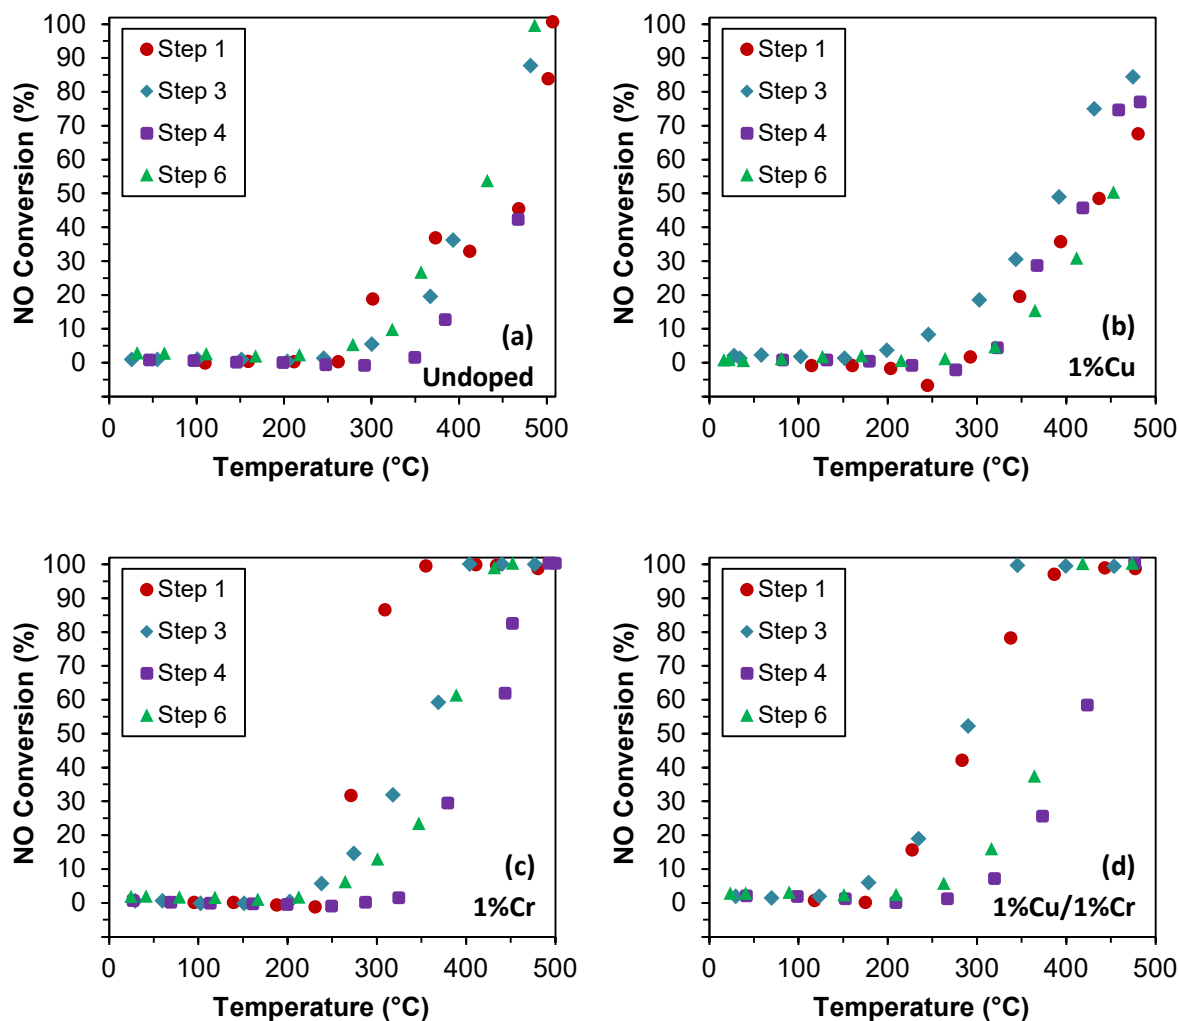

**Figure S8.** Repeated NO reduction steps for (a) undoped ceria nanorods, (b) 1 wt. % Cu-doped ceria nanorods, (c) 1 wt. % Cr-doped ceria nanorods, and (d) 1%Cu/1%Cr-ceria.

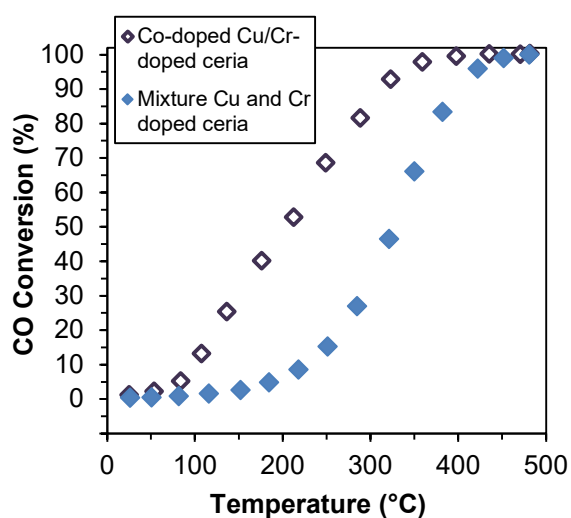

**Figure S9.** CO oxidation catalytic conversions for ceria nanorods co-doped with 1 wt. % each Cu and Cr (15 mg catalyst weight), compared with a physical mixture of 2 wt. % Cu-doped ceria and 2 wt. % Cr-doped ceria (7.5 mg each, to achieve equal amounts of Ce, Cr, and Cu).
